# Supplementary material for: An Improved Method for Raindrop Size Distribution Retrieval Using Combined Dual-frequency Radar DFR
Source: Copernicus journal article supplement (doi:10.5194/egusphere-2026-174), 2026-02-23
Supplement: Supplementary file [file egusphere-2026-174-AC2-supplement.pdf]

*This manuscript addresses the DFR-Dm dual-solution ambiguity in dual-frequency radar DSD retrievals by incorporating Ka/W-band DFR as an additional constraint. The method is well-designed and shows clear improvements, particularly for weak echoes. The following three key issues should be addressed prior to publication.*

*1. Clarify that W-band data are simulated, not observed*

*The manuscript's central innovation relies on Ka/W-band DFR, but it appears from Section 3.6 that W-band reflectivities are simulated using T-matrix calculations based on measured DSDs, rather than directly observed. Given that W-band radar suffers from extreme attenuation in rainfall, this distinction is critical. The authors must explicitly state in the abstract, introduction, and Section 3.1 that this is a simulation-based retrieval framework, and add a clear statement: "W-band reflectivities used in this study are simulated using the T-matrix method based on measured DSDs."*

**Response:** We sincerely thank the reviewer for this critical and constructive comment. We fully agree with the reviewer's assessment that the W-band reflectivities used in this study were obtained through T-matrix scattering simulations based on measured DSDs, rather than from actual W-band radar observations. Consequently, we have emphasized this point in the abstract, conclusions and Section 5.1.

Abstract: "..., This study demonstrates that W-band reflectivities obtained through scattering simulations based on measured raindrop size distributions, combined with the DFR(Ka, W) constraint, effectively mitigate the DFR(X, Ka)-Dm dual-solution ambiguity. ...".

Conclusions: "..., It is important to emphasize the W-band reflectivities were obtained through scattering simulations rather than actual radar observations,..."

### 5.1 Practical Applicability of Ka-W Constraints

It is important to explicitly acknowledge that this study does not include W-band radar observations. The W-band reflectivities used herein were obtained entirely through T-matrix scattering simulations based on measured DSDs. Therefore, the DFR(Ka, W) constraint should currently be regarded as a theoretical assessment of its potential to mitigate DFR-Dm ambiguity, rather than a fully operational retrieval constraint that has been validated with real three-frequency radar data. The practical implementation of this approach would require a three-frequency radar system with X/Ka/W bands, and the actual performance may be affected by W-band radar calibration accuracy, atmospheric attenuation at W-band, and signal-to-noise ratio limitations. This study provides a proof-of-concept demonstration that motivates the development of future three-frequency radar systems for operational DSD retrieval.

## 2. Specify handling of remaining ambiguous cases ( $DFR(Ka, W) \leq 0$ )

Table 6 shows that 12.5% of data points still fall within the ambiguous zone of  $DFR(Ka, W)$  (i.e.,  $DFR(Ka, W) \leq 0$ ). The authors do not specify how these "doubly ambiguous" cases are handled (discarded? default value? constrained by  $Z_{Ka}$ -LWC?). Please provide a complete decision tree or flow chart (as an enhancement to Figure 1) and evaluate the retrieval performance for these cases.

**Response:** We sincerely thank the reviewer for raising this important point regarding the handling of the remaining 12.5% of data points that fall within the ambiguous zone of  $DFR(Ka, W)$ .

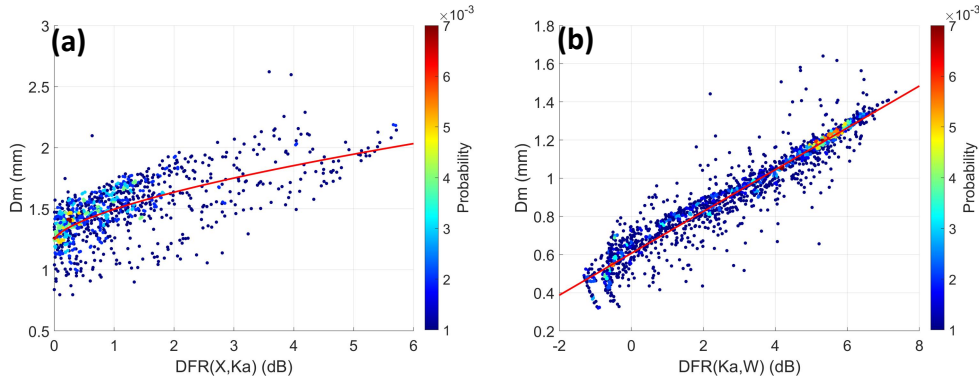

Figure 13. DFR-Dm fitting curve [a:  $DFR(X, Ka) > 0$ , b:  $DFR(Ka, W)$  when  $DFR(X, Ka) \leq 0$ ]

In the revised manuscript (Section 4.1), we present the combined retrieval formula (Eq. 19) as follows:

$$D_m = \begin{cases} 0.251DFR(X, Ka)^{0.6391} + 1.2445 & DFR(X, Ka) > 0 \\ 0.11DFR(Ka, W) + 0.6064 & DFR(X, Ka) \leq 0 \end{cases}$$

This formulation implicitly applies the  $DFR(Ka, W)$ - $D_m$  relationship whenever  $DFR(X, Ka) \leq 0$ , regardless of whether  $DFR(Ka, W)$  is positive or negative. We note that Section 4.1 of the revised manuscript includes the following statement: "**Specifically, the  $DFR(Ka, W)$ - $D_m$  accurately retrieves larger  $D_m$  values when  $DFR(Ka, W)$  is less than 0, with retrieval errors remaining only for raindrops smaller than 0.5 mm (Fig. 13b). Furthermore, as indicated in Fig. 14, rain rates do not exceed  $0.6 \text{ mm h}^{-1}$  when  $D_m$  is below 0.5 mm. Therefore, the retrieval error associated with  $DFR(Ka, W)$  in this range is almost negligible.**"

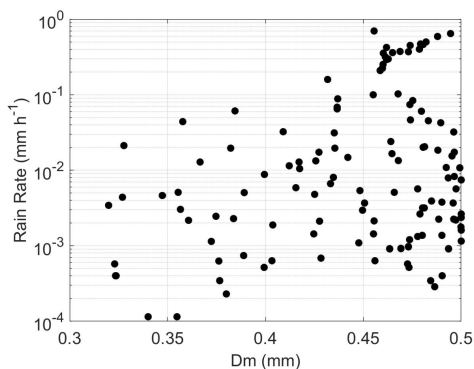

Figure 14. Scatterplots of rain rate versus  $D_m$  when  $D_m$  is below 0.5 mm based on measured DSDs

### 3. Quantitative assessment of the inversion errors caused by temperature variations

Provide quantitative error analysis (e.g.,  $D_m$  bias) for  $0^\circ\text{C}$ ,  $10^\circ\text{C}$ , and  $30^\circ\text{C}$ , not just state that errors are small.

**Response:** We have added error analysis at different temperature. Thanks for your suggestion.

“To evaluate the impact of temperature on raindrop size distribution retrieval, we take  $\text{DFR}(K_a, W)$  as an example to simulate the retrieved relationship between  $\text{DFR}(K_a, W)$  and  $D_m$  for raindrops at different temperatures (Fig. 2a). As shown in Fig. 2b, the RMSE of  $D_m$  retrieval is minimized at  $20^\circ\text{C}$ . Therefore, the  $\text{DFR}-D_m$  retrieval model was established with  $20^\circ\text{C}$  adopted as the reference temperature.”

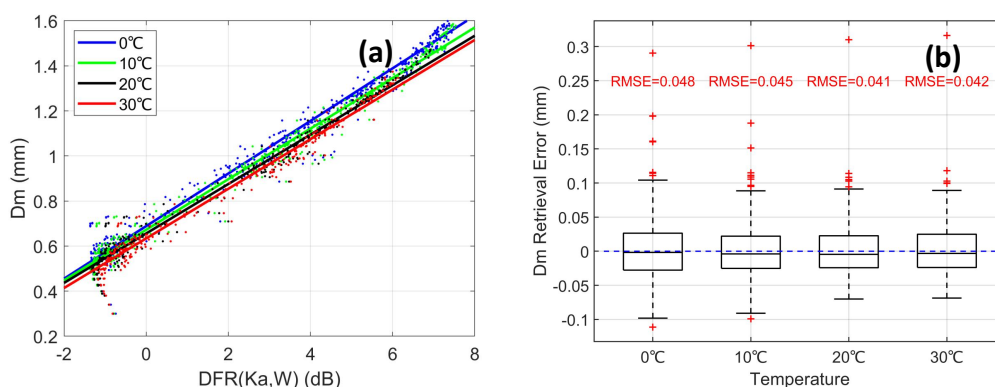

Figure 2. Fitting curves(a) and  $D_m$  retrieval error(b) of  $\text{DFR}(K_a, W)-D_m$  at different temperatures (blue:  $0^\circ\text{C}$ ; green:  $10^\circ\text{C}$ ; black:  $20^\circ\text{C}$ ; red:  $30^\circ\text{C}$  ).
